# Supplementary material for: Participation in cooperative prey capture and the benefits gained from it are associated with individual personality
Source: PubMed Central journal article supplement — Curr Zool. 2016 Sep 27;63(5):561–7. doi: 10.1093/cz/zow097 (PMC5637736; doi:10.1093/cz/zow097), 2016-09-27
Supplement: NIHMS863674-supplement-Supplemental.pdf [file NIHMS863674-supplement-Supplemental.pdf]

Supplement 1. Random Effect Estimates

| Response Variable                         | Covariance Parameter | Estimate | Std. Error | 95% Lower | 95% Upper |
|-------------------------------------------|----------------------|----------|------------|-----------|-----------|
| Attack vs. Mass Change                    |                      |          |            |           |           |
|                                           | Source ID            | 1.11E-07 | 2.30E-07   | 1.57E-08  | 0.283     |
|                                           | Colony ID            | 1.09E-06 | 4.75E-07   | 5.38E-07  | 3.24E-06  |
|                                           | Residual             | 5.63E-06 | 5.60E-06   | 4.67E-06  | 6.91E-06  |
| Boldness vs. Attacks on Dummy Prey        |                      |          |            |           |           |
|                                           | Source ID            | 0        | 0          | 0         | 0         |
|                                           | Colony ID            | 0        | 0          | 0         | 0         |
|                                           | Residual             | 0.65     | 0.65       | 0.65      | 0.65      |
| Boldness vs. Mass Change                  |                      |          |            |           |           |
|                                           | Source ID            | 4.28E-08 | 2.10E-07   | 4.27E-09  | 1.42E+22  |
|                                           | Colony ID            | 1.25E-06 | 5.37E-07   | 6.23E-07  | 3.64E-06  |
|                                           | Residual             | 6.22E-06 | 6.13E-07   | 5.17E-06  | 7.62E-06  |
| Keystone Presence vs. Mass Change         |                      |          |            |           |           |
|                                           | Source ID            | 0        | 0          | 0         | 0         |
|                                           | Residual             | 2.01E-06 | 4.50E-07   | 1.36E-06  | 3.29E-06  |
| Keystone Presence vs. Aggressiveness      |                      |          |            |           |           |
|                                           | Source ID            | 0        | 0          | 0         | 0         |
|                                           | Residual             | 1636.21  | 365.87     | 1102.91   | 2678.68   |
| Keystone Presence vs. Number of Attackers |                      |          |            |           |           |
|                                           | Source ID            | 0        | 0          | 0         | 0         |
|                                           | Residual             | 0.23     | 0.05       | 0.15      | 0.38      |
